# Supplementary material for: Carboxypeptidase B blocks ex vivo activation of the anaphylatoxin-neutrophil extracellular trap axis in neutrophils from COVID-19 patients
Source: Springer Nature journal article supplement (doi:10.1186/s13054-021-03482-z), 2021-02-08
Supplement: MOESM2 [file 18842324]

**A**

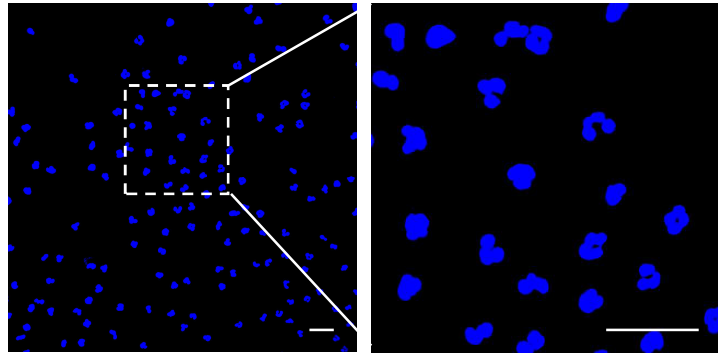

**B**

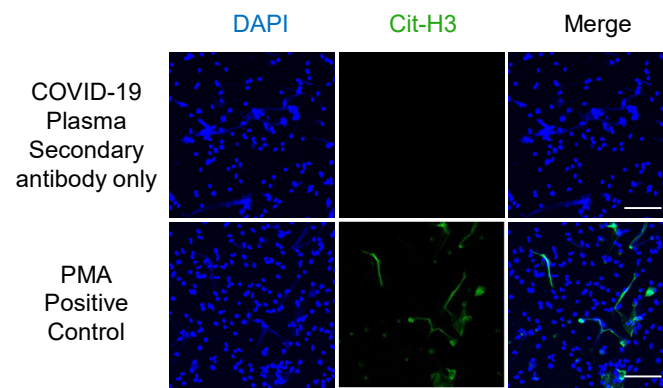

Additional file 2
