# Supplementary material for: Carboxypeptidase B blocks ex vivo activation of the anaphylatoxin-neutrophil extracellular trap axis in neutrophils from COVID-19 patients
Source: Springer Nature journal article supplement (doi:10.1186/s13054-021-03482-z), 2021-02-08
Supplement: MOESM4 [file 18842324]

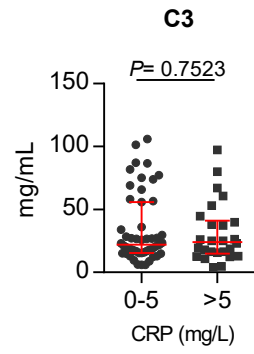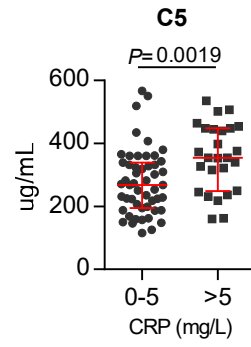

Additional file 4
